# Supplementary material for: Biotic and abiotic factors investigated in two Drosophila species – evidence of both negative and positive effects of interactions on performance
Source: PubMed Central journal article supplement (PMC5216344; doi:10.1038/srep40132), 2017-01-06
Supplement: srep40132-s1.pdf [file srep40132-s1.pdf]

1 **Supplementary information for:**

2 **Biotic and abiotic factors investigated in two *Drosophila* species –**  
3 **evidence of both negative and positive effects of interactions on**  
4 **performance**

5  
6 Michael Ørsted<sup>1\*</sup>, Mads Fristrup Schou<sup>2</sup> and Torsten Nygaard Kristensen<sup>1,2</sup>

7 <sup>1</sup>Department of Chemistry and Bioscience, Section of Biology and Environmental Science, Aalborg  
8 University, Fredrik Bajers Vej 7H, DK-9220 Aalborg E, Denmark

9 <sup>2</sup>Department of Bioscience, Section of Genetics, Ecology and Evolution, Aarhus University, Ny  
10 Munkegade 114, DK-8000 Aarhus C, Denmark

11  
12 \* Corresponding author:

13 Michael Ørsted, email: moer@bio.aau.dk  
14

15 **Contents**

16 Supplementary discussion ..... 2  
17 Supplementary Table S1 ..... 7  
18 Supplementary Table S2 ..... 8  
19 Supplementary Figure S1 ..... 9  
20 Supplementary Figure S2 ..... 10  
21 Supplementary Figure S3 ..... 11  
22 Supplementary Figure S4 ..... 12  
23 Supplementary Figure S5 ..... 14  
24 Supplementary materials references ..... 16

## 27 ***Supplementary discussion***

28       The main point of this study is to present and discuss the results of a set of complex  
29 interactions in a multi-trait, multi-species analysis. In doing so, however, we realised certain  
30 problems with the classically defined synergism and antagonism terms. Others have discussed  
31 problems associated with the traditional definitions struggling to describe the situations of more  
32 complex outcomes, which seem to be fairly common when analysing interactions, both in  
33 laboratory experiments and in field studies<sup>1-4</sup>. Congruent with such studies, we point to challenges  
34 with the typical direction-independent classification because of the issues and limitations of the  
35 traditional framework outlined here. Also, a large numbers of studies on multiple environmental  
36 factors report interactions based on imprecise descriptions or simply the qualitative judgement of  
37 the authors<sup>5</sup>. Thus, in the scientific literature there is a lack of consensus on operationally robust  
38 definitions and quantification of synergism and antagonism<sup>2,3,6-8</sup>.

39       The long-standing scientific classic definitions of synergism and antagonism are valid. We are  
40 merely proposing an expansion on the traditional definitions. As first proposed by Piggott et al.  
41 (2015)<sup>4</sup>, and in our work expanded to include three-way interactions, we utilised a system  
42 combining the ‘interaction effect’ (as in the classic effect deviation from the additive model  
43 prediction<sup>6</sup>), with the magnitude and direction of the response (+ or –) relative to individual  
44 treatment effects in absolute terms. Thus, the “re-defined” synergism and antagonism still pertain  
45 to the classic “more than” and “less than”, respectively, as it is traditionally understood.

46       The lack of consensus on definitions is most likely due to the usage of these terms throughout  
47 widely different scientific disciplines from ecology to toxicology and medicine. In toxicology and to  
48 some extent ecology (and thus ecotoxicology) interactions are frequently regarded as “stressful”  
49 and therefore exclusively detrimental to the overall performance of the subject species<sup>4,6</sup>. In this  
50 context of viewing interactions as always being negative, a synergistic interaction is defined as an

51 interaction causing negative effect greater than predicted by an additive model and an  
52 antagonistic interaction as a negative effect that is less than predicted from additivity.

53 To highlight the problems and limitations of the classic framework in ecological interactions,  
54 especially related to the “always-negative” view on interactions, we tried to re-designate  
55 classically defined terms to the interactions observed in our dataset (**Supplementary Figure 4** and  
56 **Supplementary Figure 5**). In doing so we identified several issues listed below, and compared our  
57 findings to other studies employing the traditional definition framework:

58 1) In situations where neither individual environmental condition has a significant effect on a  
59 trait but the interaction is significantly negative, interactions cannot be properly  
60 determined by classic definitions; e.g. when  $0 + 0 < 0$ . Attempting to classify these  
61 situations in the classic paradigm would always result in synergism i.e. “more negative  
62 than” the individual effects, as antagonism is interpreted as “less negative than” the  
63 individual effects (not pertaining to the result being positive or negative in terms of  
64 fitness/performance, but how the interaction relates to the additive expectation).  
65 Examples from the present study that represent this sort of challenge in defining  
66 interactions in the classic framework are marked with a superscript “x” in **Supplementary**  
67 **Figure 4** and **Supplementary Figure 5**.

68 2) Even if still pertaining to the “all negative” nature of interactions, in situations where one  
69 individual factor has a negative effect while the other has no effect, and their cumulative  
70 effect is more negative than additively expected, the classic paradigm is also struggling. In  
71 (eco)toxicology this is sometimes referred to as potentiation or sensitisation<sup>9</sup> and some  
72 argue that it is not true “synergism” because it is one-sided and the underlying modes of  
73 action are different<sup>10</sup>. We have not included such further definitions, because it would  
74 confuse more than contribute, and we believe all situations are encompassed and  
75 informatively described by the re-conceptualised terms used in the present study.

76 Examples from the present study that represent this sort of challenge in defining  
77 interactions in the classic framework are marked with a superscript “y” in **Supplementary**  
78 **Figure 4** and **Supplementary Figure 5**.

79 In contrast to the persistent “all negative” view of interactions and the individual factors  
80 assessed, positive effects of individual environmental factors and even positive effects of  
81 interactions must be recognised. In ecotoxicology this phenomenon is often referred to as  
82 hormesis and is readily observed when assessing the effects of chemicals, e.g. at low dose<sup>7,8,11</sup>.  
83 While some “stressors” like chemicals are most frequently investigated as a gradient  
84 (concentrations), and thus might result in hormesis being observed at a low dose, other  
85 “stressors” are not as easily applied at a continuous scale e.g. biotic factors including co-occurring  
86 species or predation/parasitism, which is more of a presence/absence situation. Indeed, one could  
87 apply varying levels (densities) of co-occurring species or predators/parasites, but in a full-factorial  
88 study on interactions this would quickly scale to non-manageable proportions.

89 Even if accepting positive effects of interactions on performance or more importantly the  
90 positive effect (direction) of one or more individual factors, as employed in several recent reviews  
91 on interactions<sup>1,4</sup>, we identify several issues using the classic definitions. While the identification of  
92 a synergism or antagonism is generally straightforward when all factors operate in the same  
93 direction<sup>5,6</sup>, i.e. all positive (**Figure 1a**) or all negative (**Figure 1c**), problems arise when individual  
94 factors are of opposite directions (**Figure 1b**). In such situations the classic definition of synergism  
95 appears paradoxical because what is synergistic to the effect direction of one factor is antagonistic  
96 to the effect direction of the other factor(s):

97 3) By classic definitions it is difficult to classify interactions when the effects of two individual  
98 environmental conditions are in opposite direction e.g.  $-1 + 1 > 1$  (see below for further  
99 discussion). Examples from the present study that represent this sort of challenge in

100 defining interactions in the classic framework are marked with a superscript “z” in

101 **Supplementary Figure 4 and Supplementary Figure 5.**

102 4) Crain et al. (2008)<sup>1</sup>, having accepted the presence of positive effects, assumed that in  
103 situations with two opposing individual effect directions, synergy only occurred when the  
104 cumulative effect was more negative than the additive sum of the opposing individual  
105 effects. Examples from the present study where we have utilised this definition to define  
106 synergism are marked with a superscript “w” in **Supplementary Figure 4** and  
107 **Supplementary Figure 5.**

108 The definition of Crain et al. (2008)<sup>1</sup> may be appropriate if the effect direction is implicitly  
109 negative, e.g. decreased survival rate, but in many other situations such a definition is problematic  
110 from an ecological perspective because effect direction can be context dependent (see e.g.  
111 discussion of the effect direction on developmental time in main manuscript). This assumption  
112 raises another conceptual issue in that the cumulative effect of factors of opposing directions are  
113 not necessarily more negative than the single negative stressor acting alone (see “comparative  
114 effects” model of Folt et al. 1999<sup>6</sup>). Consider an example of a factor, which when applied alone has  
115 a positive effect of +1 and a factor, which when applied alone has a negative effect of -1. The  
116 additive cumulative effect of both factors combined is 0, i.e. they neutralise each other. By classic  
117 assumptions, as that of Crain et al. (2008)<sup>1</sup>, we should invoke synergy for any cumulative effect  
118 more negative than 0. However, if the cumulative effect is between -1 and 0, this interaction is  
119 intuitively antagonistic from the perspective of the negative factor’s individual effect (-1), i.e. the  
120 cumulative effect of both factors is less negative than the single negative stressor acting alone. In  
121 our proposed system, we would classify this as a *positive antagonism*, i.e. it is less positive than  
122 predicted from an additive model. Had the cumulative effect been between 0 and 1 we would  
123 classify it as a *negative antagonism*, i.e. it is less negative than predicted additively. Thus,  
124 antagonism can be easily interpreted in the traditional sense of “less than” in terms of the

125 cumulative effect relative to the effect of the individual effect size. The positive or negative prefix  
126 enables rapid interpretation of the direction relative to the cumulative effect, especially in these  
127 situations of opposing individual factors (**Figure 1b**). We want to re-enforce that these prefixes  
128 does not describe the performance or fitness effect of the interaction, i.e. a *positive antagonism* is  
129 not necessarily beneficial to the organism, partly because it can be difficult to establish the  
130 relationship between an effect direction and its costs and benefits to performance in some traits,  
131 e.g. as in the case of developmental time<sup>12</sup>. However this is not a problem specifically pertinent to  
132 our system, this is also a problem in the classic definitions framework.

133 The system also includes a new form of synergy, referred to as “mitigating synergism”, when  
134 individual environmental factors operating in the same direction interact and result in a  
135 cumulative effect in the opposite direction, e.g. two positives make a negative (S-) or two  
136 negatives make a positive (S+). Such strong interactions might be of great interest in predicting  
137 ecological consequences of multiple environmental factors, because different treatments can  
138 synergistically inhibit or mitigate the effect of individual factors<sup>4,7</sup>.

139 While we realise that these introduced interaction terms can seem unduly complicated, we  
140 believe that the re-conceptualized terms provide more informative descriptions and  
141 straightforward interpretations of complex interactions, which would be difficult to even describe  
142 in the classic context.

143

144 **Supplementary Table S1:** Environmental treatments in a full factorial design, showing  
 145 temperature, dimethoate concentration, co-occurrence status, number of vials in a respective  
 146 treatment and number of eggs per vial. Temp.: temperature. Dim.: dimethoate. Co-occur.: co-  
 147 occurrence. *D. hydei*: hyd. *D. melanogaster*: mel.

| Identification code | Species | Temp. (°C) | Dim. (ppb) | Co-occur. | Number of vials | Number of eggs per vial |
|---------------------|---------|------------|------------|-----------|-----------------|-------------------------|
| h-25-0              | hyd     | 25         | 0          | No        | 30              | 40                      |
| h-25-75             | hyd     | 25         | 75         | No        | 40              | 40                      |
| m-25-0              | mel     | 25         | 0          | No        | 30              | 40                      |
| m-25-75             | mel     | 25         | 75         | No        | 30              | 40                      |
| h/m -25-0           | hyd/mel | 25         | 0          | Yes       | 30              | 20 of each species      |
| h/m -25-75          | hyd/mel | 25         | 75         | Yes       | 40              | 20 of each species      |
| h-13-0              | hyd     | 13         | 0          | No        | 30              | 40                      |
| h-13-75             | hyd     | 13         | 75         | No        | 40              | 40                      |
| m-13-0              | mel     | 13         | 0          | No        | 30              | 40                      |
| m-13-75             | mel     | 13         | 75         | No        | 30              | 40                      |
| h/m-13-0            | hyd/mel | 13         | 0          | Yes       | 30              | 20 of each species      |
| h/m -13-75          | hyd/mel | 13         | 75         | Yes       | 40              | 20 of each species      |
| h-31-0              | hyd     | 31         | 0          | No        | 30              | 40                      |
| h-31-75             | hyd     | 31         | 75         | No        | 40              | 40                      |
| m-31-0              | mel     | 31         | 0          | No        | 30              | 40                      |
| m-31-75             | mel     | 31         | 75         | No        | 30              | 40                      |
| h/m -31-0           | hyd/mel | 31         | 0          | Yes       | 30              | 20 of each species      |
| h/m -31-75          | hyd/mel | 31         | 75         | Yes       | 40              | 20 of each species      |

148

149

150

151

152

153

154 **Supplementary Table S2:** Number of flies used from each species from each treatment for  
 155  $CT_{min}$ ,  $CT_{max}$ , developmental time, and RING for each sex and for egg-to-adult viability for both  
 156 sexes combined. Average number of flies (and standard deviation (S.D.)) from each trait is also  
 157 given. NA values indicate that no or too few flies emerged from a given treatment. The minimum  
 158 number of measurements (limit  $n$ ) for  $CT_{min}$ ,  $CT_{max}$ , and developmental time was 5 and for RING  
 159 and egg-to-adult viability it was 50 and 30, respectively. Dim.: dimethoate. Co-occur.: co-  
 160 occurrence.

161

| Trait                  | $CT_{max}$               |       | $CT_{min}$ |       | Developmental time |       | RING    |       | Viability |      |
|------------------------|--------------------------|-------|------------|-------|--------------------|-------|---------|-------|-----------|------|
|                        | Sex                      | Males | Females    | Males | Females            | Males | Females | Males | Females   | Both |
| <i>D. hydei</i>        | 25 °C (Control)          | 8     | 17         | 9     | 20                 | 119   | 116     | 100   | 100       | 30   |
|                        | 25 °C + Co-occur.        | 20    | 22         | 26    | 28                 | 145   | 163     | 100   | 100       | 30   |
|                        | 25 °C + Dim.             | 21    | 19         | 30    | 20                 | 162   | 129     | 100   | 100       | 30   |
|                        | 25 °C + Co-occur. + Dim. | 19    | 17         | 27    | 26                 | 68    | 65      | 100   | 100       | 40   |
|                        | 13 °C                    | NA    | 7          | 10    | 12                 | 182   | 199     | 100   | 100       | 30   |
|                        | 13 °C + Co-occur.        | 22    | 16         | 13    | 16                 | 172   | 137     | 100   | 50        | 30   |
|                        | 13 °C + Dim.             | 10    | 12         | 14    | 15                 | 43    | 35      | 50    | NA        | 30   |
|                        | 13 °C + Co-occur. + Dim. | NA    | NA         | NA    | NA                 | NA    | 6       | NA    | NA        | 40   |
|                        | 31 °C                    | 9     | 10         | 9     | 9                  | 66    | 60      | NA    | 100       | 30   |
|                        | 31 °C + Co-occur.        | 6     | 12         | 7     | 14                 | 40    | 49      | 50    | 50        | 30   |
|                        | 31 °C + Dim.             | 10    | 8          | 10    | 8                  | 46    | 54      | 100   | 50        | 30   |
|                        | 31 °C + Co-occur. + Dim. | 20    | 20         | 19    | 19                 | 134   | 102     | 100   | 100       | 40   |
|                        | Average $n$              | 15    | 15         | 16    | 17                 | 107   | 93      | 90    | 85        | 33   |
| S.D.                   | 6                        | 5     | 8          | 6     | 53                 | 55    | 20      | 23    | 4         |      |
| <i>D. melanogaster</i> | 25 °C (Control)          | 20    | 19         | 20    | 20                 | 466   | 494     | 100   | 100       | 30   |
|                        | 25 °C + Co-occur.        | 19    | 18         | 20    | 20                 | 276   | 262     | 100   | 100       | 30   |
|                        | 25 °C + Dim.             | 19    | 19         | 19    | 20                 | 424   | 434     | 100   | 100       | 30   |
|                        | 25 °C + Co-occur. + Dim. | 18    | 17         | 20    | 18                 | 354   | 368     | 100   | 100       | 40   |
|                        | 13 °C                    | 27    | 20         | 18    | 20                 | 440   | 516     | 100   | 100       | 30   |
|                        | 13 °C + Co-occur.        | 19    | 20         | 20    | 20                 | 208   | 209     | 50    | 100       | 30   |
|                        | 13 °C + Dim.             | 20    | 20         | 19    | 20                 | 439   | 428     | 100   | 100       | 30   |
|                        | 13 °C + Co-occur. + Dim. | 20    | 20         | 19    | 20                 | 306   | 313     | 100   | 100       | 40   |
|                        | 31 °C                    | 19    | 20         | 20    | 20                 | 475   | 491     | 100   | 100       | 30   |
|                        | 31 °C + Co-occur.        | 19    | 20         | 19    | 20                 | 218   | 233     | 100   | 100       | 30   |
|                        | 31 °C + Dim.             | 19    | 20         | 20    | 20                 | 492   | 495     | 100   | 100       | 30   |
|                        | 31 °C + Co-occur. + Dim. | 19    | 20         | 20    | 19                 | 301   | 326     | 100   | 100       | 40   |
|                        | Average $n$              | 20    | 19         | 20    | 20                 | 367   | 381     | 96    | 100       | 33   |
| S.D.                   | 2                        | 1     | 1          | 1     | 98                 | 106   | 14      | 0     | 4         |      |
| Limit $n$              | 5                        | 5     | 5          | 5     | 5                  | 5     | 50      | 50    | 30        |      |



162 **Supplementary Figure S1**

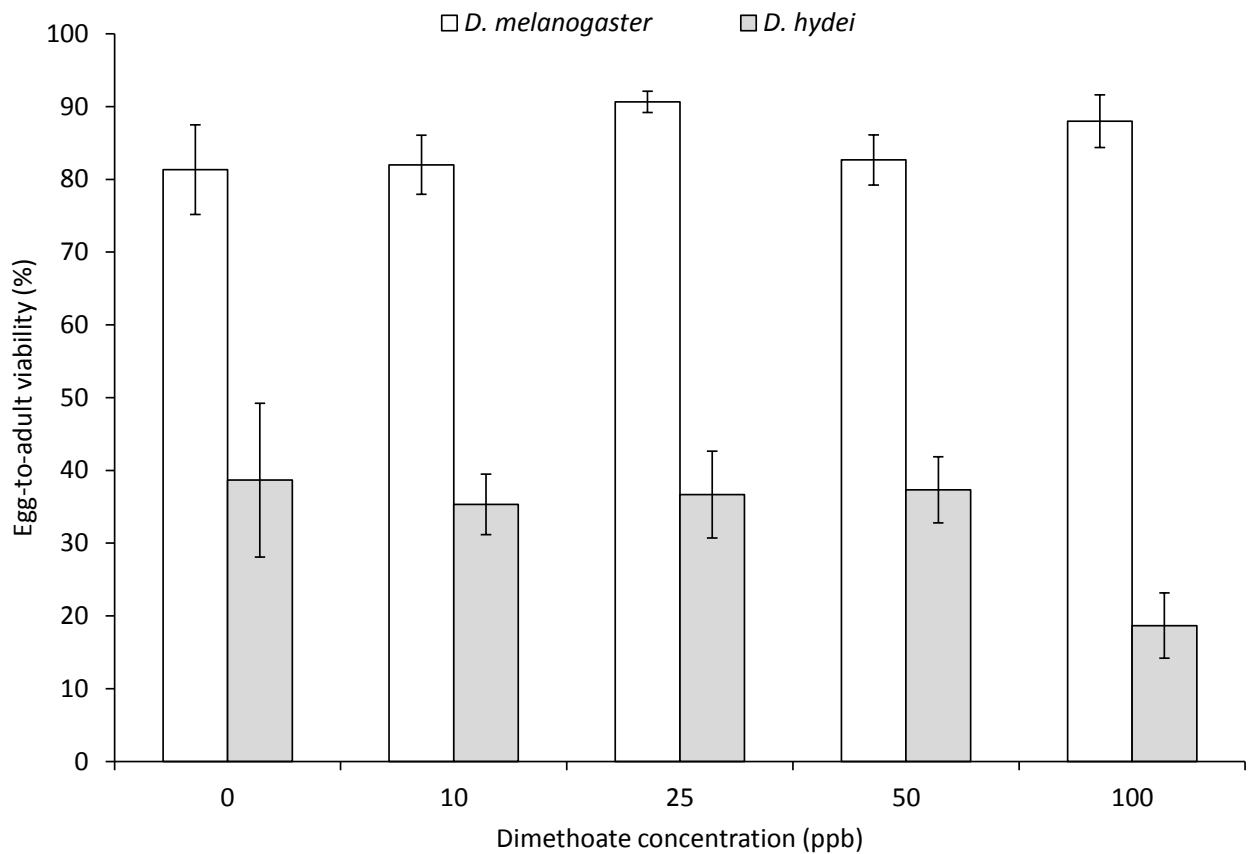

163

164 **Supplementary Figure S1:** Preliminary screening of egg-to-adult viability (%) in *D. hydei* (grey filled  
165 bars) and *D. melanogaster* (white open bars) at a range of dimethoate concentration from 0 to  
166 100 ppb. Error bars represent standard error ( $n = 5$ ). The media setup, egg collection procedure  
167 and subsequent scoring of viability followed the same procedure as described in the main  
168 experiment (40 eggs per vial with 9 mL Formula 4-24® Instant *Drosophila* Medium Blue  $\pm$   
169 dimethoate).

170

171 **Supplementary Figure S2**

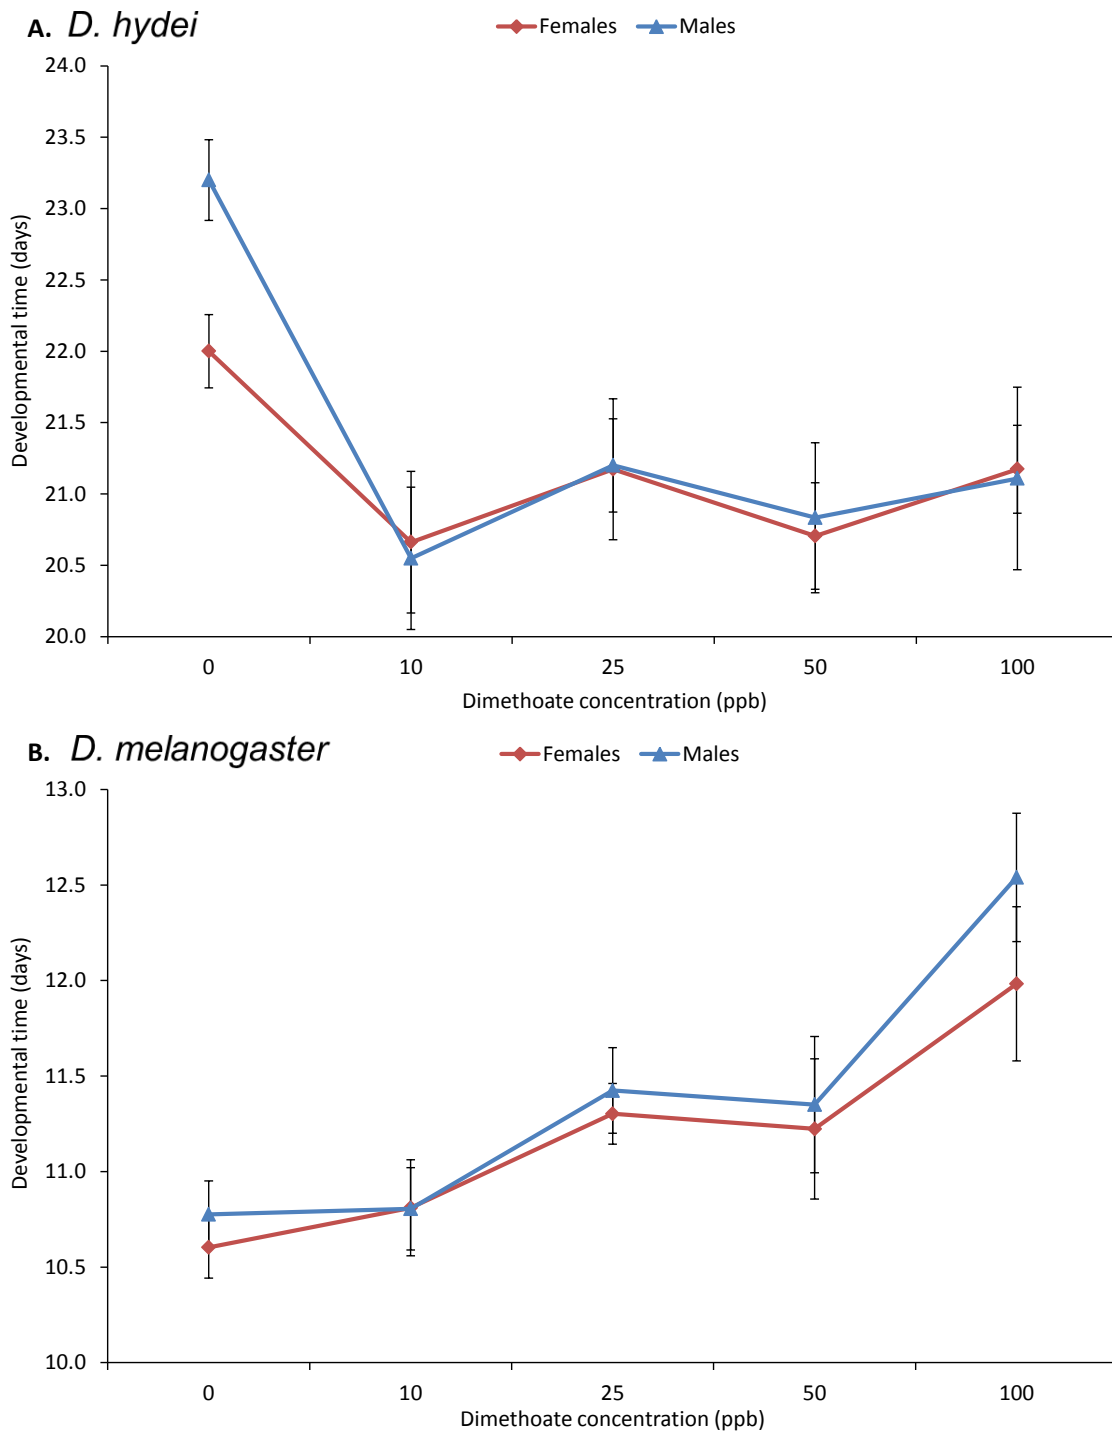

172 **Supplementary Figure S2:** Preliminary screening of egg-to-adult developmental time (in days) in  
173 females (red) and males (blue) of *D. hydei* (A.) and *D. melanogaster* (B.) at a range of dimethoate  
174 concentration from 0 to 100 ppb. Error bars represent standard error ( $n = 5$ ). The media setup, egg  
175 collection procedure and subsequent scoring of developmental time followed the same procedure  
176 as described in the main experiment (40 eggs per vial with 9 mL Formula 4-24® Instant *Drosophila*  
177 Medium Blue  $\pm$  dimethoate).

178 **Supplementary Figure S3**

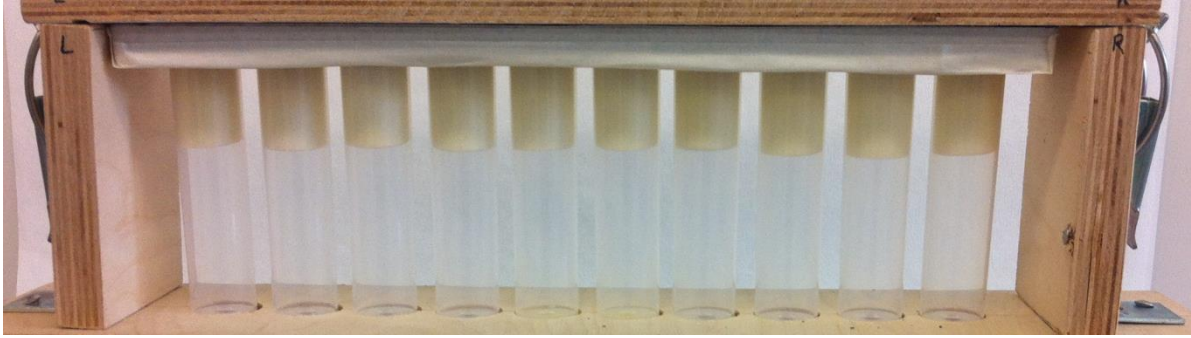

179 **Supplementary Figure S3:** Front side view of the Rapid Iterative Negative Geotaxis (RING) assay  
180 apparatus modified from Gargano et al. (2005)<sup>13</sup>. Our version of the RING apparatus was a custom  
181 built open-faced wooden box with a detachable lid held in place with lock hinges. The rack holds  
182 10 empty vertical 27 mL vials. Into the floor of the apparatus was milled a 1 mm indentation as  
183 support for 10 empty vertical 27 mL vials. Foam stoppers were inserted to an equal depth across  
184 all 10 vials and the lid of the apparatus holds the negative geotaxis vials in place when locked with  
185 hinges. A camera was mounted 30 cm from the apparatus to capture photos of the negative  
186 geotaxis behaviour.

*Drosophila hydei*

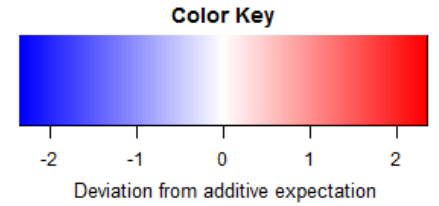

| Trait and sex                |                            |                              |                            |                                  |                                |                                 |                               |                           |               |                         |
|------------------------------|----------------------------|------------------------------|----------------------------|----------------------------------|--------------------------------|---------------------------------|-------------------------------|---------------------------|---------------|-------------------------|
| CT <sub>max</sub><br>Females | CT <sub>max</sub><br>Males | CT <sub>min</sub><br>Females | CT <sub>min</sub><br>Males | Developmental<br>time<br>Females | Developmental<br>time<br>Males | Negative<br>geotaxis<br>Females | Negative<br>geotaxis<br>Males | Egg-to-adult<br>viability | Total average |                         |
| 0.55 * S                     | 0.86                       | 0.32                         | -0.55                      | 0.17 * S                         | 0.2 * S                        | 1.45                            | NA                            | 2.35 * ? <sup>Z</sup>     | 0.67 ± 0.32   | Heat x Co-occur. x Dim. |
| -1.18 * A <sup>Y</sup>       | NA                         | -0.08                        | -0.31                      | -0.07 * S <sup>Y</sup>           | -0.15 * S <sup>Z,W</sup>       | -0.02                           | 0.67                          | 0.15                      | -0.12 ± 0.18  | Cold x Co-occur.        |
| -0.4 * A <sup>Y</sup>        | -1.36 * A <sup>Y</sup>     | -0.44                        | 0.31                       | -0.17 * A                        | -0.19 * A                      | -0.37                           | NA                            | 0.19                      | -0.3 ± 0.18   | Heat x Dim.             |
| -0.64 * A                    | -0.75                      | 0.02                         | 0.4                        | -0.16 * A                        | -0.24 * A                      | -1.13                           | NA                            | -0.28                     | -0.35 ± 0.17  | Heat x Co-occur.        |
| -0.14                        | -0.64                      | -0.19                        | -0.01                      | -0.03                            | -0.08                          | -1.21                           | NA                            | -1.22 * S <sup>Z,W</sup>  | -0.44 ± 0.18  | Co-occur. x Dim.        |
| -0.62                        | NA                         | -0.27                        | -0.27                      | 0.1 * ? <sup>Z</sup>             | 0.05                           | NA                              | -0.7                          | -1.46 * S <sup>Y</sup>    | -0.45 ± 0.20  | Cold x Dim.             |
| NA                           | NA                         | NA                           | NA                         | -0.05                            | NA                             | NA                              | NA                            | -1.31 * S <sup>Z,W</sup>  | -0.68 ± 0.63  | Cold x Co-occur. x Dim. |
| 0.49 *                       | 1.03 *                     | 0.11                         | -0.1                       | 0.12 *                           | 0.19 *                         | 1.38 *                          | 1.32 *                        | 0.67 *                    | 0.58 ± 0.18   | Co-occur.               |
| 0.2                          | 0.76                       | 0.45 *                       | -0.02                      | 0.11 *                           | 0.13 *                         | 1.11 *                          | 1.12 *                        | -0.44 *                   | 0.38 ± 0.18   | Dim.                    |
| 0.59                         | NA                         | 1.96 *                       | 2.14 *                     | -1.28 *                          | -1.24 *                        | -0.9 *                          | -0.9 *                        | -0.14                     | 0.03 ± 0.49   | Cold                    |
| 0.86 *                       | 2.27 *                     | -1.68 *                      | -2.07 *                    | 0.54 *                           | 0.6 *                          | -0.67 *                         | NA                            | -1.52 *                   | -0.21 ± 0.54  | Heat                    |

Interactions

Individual factors

188 **Supplementary Figure S4:** Heat map showing the direction and magnitude of the model coefficients reflecting the effects of treatments on egg-  
189 to-adult viability, developmental time,  $CT_{min}$ ,  $CT_{max}$  and negative geotaxis (RING assay) in *D. hydei*. The effects are shown for both sexes in all  
190 traits except egg-to-adult viability. Positive coefficients represent positive deviation from the additive expectation, and can thus be interpreted  
191 as a performance advantage of the interaction itself, regardless of whether the treatment overall was beneficial in terms of performance when  
192 compared to the control. Contrary, a negative coefficient implies a negative deviation from additivity and that the interaction itself is  
193 detrimental to performance for a given trait. The direction of the effect is illustrated by colour shading from blue (negative) to red (positive)  
194 and the values indicate the strength of the effects. The upper part includes all two- and three-way interactions between heat or cold, co-  
195 occurrence (Co-occur.), and dimethoate (Dim.). The lower part includes all effects of the individual factors. Within each part the treatments  
196 (rows) have been sorted by the average total effect, i.e. the average effect across traits  $\pm$  S.E., in descending order. An asterisk indicates a  
197 significant interaction, or a significant effect of the individual environmental factor. The direction of the interaction has been determined based  
198 on the traditional definitions of synergism (S) and antagonism (A). In doing so we identified several issues; the nature of these challenges is  
199 marked with subscripts <sup>w, x, y</sup> or <sup>z</sup> next to the designation of the interaction. Some interactions might relate to several issues and are given  
200 multiple subscript characters, and some interactions simply could not be determined based on contradicting definitions of the classic  
201 framework (designated with a question mark). The details of these challenges are described in the text in the **Supplementary discussion**. Some  
202 treatments did not yield enough live adult flies for assessing all traits or did not exceed the minimum number of flies needed for assessing a  
203 trait. In a few traits the effect of an individual environmental factor could therefore not be determined, and the interactions involving the  
204 particular factor were omitted from the model. Both cases are designated NA.

*Drosophila melanogaster*

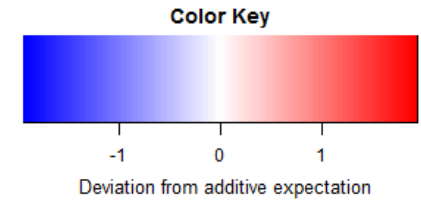

| Trait and sex |              |               |             |                            |                          |                           |                         |                        |               | Interactions            |
|---------------|--------------|---------------|-------------|----------------------------|--------------------------|---------------------------|-------------------------|------------------------|---------------|-------------------------|
| CTmax Females | CTmax Males  | CTmin Females | CTmin Males | Developmental time Females | Developmental time Males | Negative geotaxis Females | Negative geotaxis Males | Egg-to-adult viability | Total average |                         |
| 0.01          | 0.4          | 0.03          | 0.19        | -0.02                      | 0.11 * $A^y$             | 0.54                      | -0.33                   | 0.98 * $A^x$           | 0.21 ± 0.13   | Co-occur. x Dim.        |
| 0.33          | 0.61 * $A^y$ | -0.08         | 0.05        | -0.02                      | 0.12 * $A$               | 0.36                      | -0.14                   | -0.8 * $S^x$           | 0.05 ± 0.13   | Cold x Co-occur.        |
| -0.19         | 0.34         | 0.09          | -0.26       | 0                          | 0.02                     | 0.28                      | -0.55                   | 0.64 * $A^x$           | 0.04 ± 0.12   | Heat x Dim.             |
| -0.37         | 0.22         | -0.01         | 0.08        | -0.06 * $S^y$              | -0.02                    | 0.66 * $A$                | -0.32                   | 0.12                   | 0.03 ± 0.10   | Cold x Dim.             |
| 0.33          | -0.46        | -0.31         | 0.4         | 0.12 * $S^y$               | -0.02                    | -0.73                     | -0.05                   | -0.92                  | -0.18 ± 0.15  | Heat x Co-occur. x Dim. |
| 0.2           | -0.69        | 0.1           | -0.24       | 0.11 * $A^y$               | -0.08                    | -1.47 * $S^{z,w}$         | 0.13                    | -0.18                  | -0.24 ± 0.18  | Cold x Co-occur. x Dim. |
| 0.42          | -0.4         | -0.36         | -0.22       | -0.09 * $A^y$              | 0.03                     | -1.06                     | -0.15                   | -0.58                  | -0.27 ± 0.14  | Heat x Co-occur.        |
| -0.24         | -0.11        | 0.39          | 0.3         | 0.04                       | -0.09 *                  | 0.24 *                    | 0.13                    | 0.26                   | 0.1 ± 0.07    | Co-occur.               |
| 1.19 *        | 0.5          | -1.19 *       | -1.37 *     | 0.28 *                     | 0.27 *                   | 0.03                      | -0.4 *                  | 0.03                   | -0.07 ± 0.27  | Heat                    |
| 0.09          | -0.13        | -0.26         | 0.01        | 0.01                       | 0                        | -0.34 *                   | 0.23 *                  | -0.53                  | -0.1 ± 0.08   | Dim.                    |
| -1.69 *       | -1.82 *      | 1.94 *        | 1.87 *      | -1.38 *                    | -1.42 *                  | -0.51 *                   | -0.9 *                  | -0.02                  | -0.44 ± 0.48  | Cold                    |

Interactions

Individual factors

206 **Supplementary Figure S5:** Heat map showing the direction and magnitude of the model coefficients reflecting the effects of treatments on egg-  
207 to-adult viability, developmental time,  $CT_{min}$ ,  $CT_{max}$  and negative geotaxis (RING assay) in *D. melanogaster*. The effects are shown for both sexes  
208 in all traits except egg-to-adult viability. Positive coefficients represent positive deviation from the additive expectation, and can thus be  
209 interpreted as a performance advantage of the interaction itself, regardless of whether the treatment overall was beneficial in terms of  
210 performance when compared to the control. Contrary, a negative coefficient implies a negative deviation from additivity and that the  
211 interaction itself is detrimental to fitness. The direction of the effect is illustrated by colour shading from blue (negative) to red (positive) and  
212 the values indicate the strength of the effects. The upper part includes all two- and three-way interactions between heat or cold, co-occurrence  
213 (Co-occur.), and dimethoate (Dim.). The lower part includes all effects of the individual factors. Within each part the treatments (rows) have  
214 been sorted by the average total effect, i.e. the average effect across traits  $\pm$  S.E., in descending order. An asterisk indicates a significant  
215 interaction, or a significant effect of the individual environmental factor. The direction of the interaction has been determined based on the  
216 traditional definitions of synergism (S) and antagonism (A). In doing so we identified several issues; the nature of these challenges is marked  
217 with subscripts <sup>w, x, y</sup> or <sup>z</sup> next to the designation of the interaction. Some interactions might relate to several issues and are given multiple  
218 subscript characters. The details of these challenges are described in the text in the **Supplementary discussion**.

219 **Supplementary materials references**

- 220 1. Crain, C. M., Kroeker, K. & Halpern, B. S. Interactive and cumulative effects of multiple  
221 human stressors in marine systems. *Ecol. Lett.* **11**, 1304–1315 (2008).
- 222 2. Darling, E. S. & Côté, I. M. Quantifying the evidence for ecological synergies. *Ecol. Lett.* **11**,  
223 1278–1286 (2008).
- 224 3. Vanhoudt, N., Vandenhove, H., Real, A., Bradshaw, C. & Stark, K. A review of multiple  
225 stressor studies that include ionising radiation. *Environ. Pollut.* **168**, 177–192 (2012).
- 226 4. Piggott, J. J., Townsend, C. R. & Matthaei, C. D. Reconceptualizing synergism and  
227 antagonism among multiple stressors. *Ecol. Evol.* **5**, 1538–1547 (2015).
- 228 5. Dunne, R. P. Synergy or antagonism-interactions between stressors on coral reefs. *Coral*  
229 *Reefs* **29**, 145–152 (2010).
- 230 6. Folt, C., Chen, C., Moore, M. & Burnaford, J. Synergism and antagonism among multiple  
231 stressors. *Limnol. Oceanogr.* **44**, 864–877 (1999).
- 232 7. Holmstrup, M. *et al.* Interactions between effects of environmental chemicals and natural  
233 stressors: a review. *Sci. Total Environ.* **408**, 3746–3762 (2010).
- 234 8. Laskowski, R. *et al.* Interactions between toxic chemicals and natural environmental factors  
235 - a meta-analysis and case studies. *Sci. Total Environ.* **408**, 3763–3774 (2010).
- 236 9. Odum, E. P. & Barrett, G. W. *Fundamentals of Ecology*. (Thomson/Brooks/Cole, Belmont,  
237 CA, USA, 2005).
- 238 10. Chou, T. C. Drug combination studies and their synergy quantification using the Chou-  
239 Talalay method. *Cancer Res.* **70**, 440–446 (2010).
- 240 11. Boonstra, R., Manzon, R. G., Mihok, S. & Helson, J. E. Hormetic effects of gamma radiation  
241 on the stress axis of natural populations of meadow voles (*Microtus pennsylvanicus*).  
242 *Environ. Toxicol. Chem.* **24**, 334–343 (2005).
- 243 12. Niemelä, P. T., Vainikka, A., Hedrick, A. V. & Kortet, R. Integrating behaviour with life  
244 history: boldness of the field cricket, *Gryllus integer*, during ontogeny. *Funct. Ecol.* **26**, 450–  
245 456 (2012).
- 246 13. Gargano, J. W., Martin, I., Bhandari, P. & Grotewiel, M. S. Rapid iterative negative geotaxis  
247 (RING): A new method for assessing age-related locomotor decline in *Drosophila*. *Exp.*  
248 *Gerontol.* **40**, 386–395 (2005).

249
